# Supplementary material for: Gausemycin A-Resistant Staphylococcus aureus Demonstrates Affected Cell Membrane and Cell Wall Homeostasis
Source: MDPI journal article supplement (doi:10.3390/microorganisms11051330), 2023-05-18
Supplement: s1 [file s1]

**Table S1** Primers used in the RT-qPCR study

| Gene description (designation)                                                         | Primer sequence                                          |
|----------------------------------------------------------------------------------------|----------------------------------------------------------|
| DNA gyrase subunit B ( <i>gyrB</i> )                                                   | F: GACGTGGTATCCCAGTTGATATT<br>R: ACCATGTAAACCACCAGATACTT |
| Transglycosylase ( <i>sceD</i> )                                                       | F: GGTACTAATGGAGCAGACATGAG<br>R: GTGCTTCAACTTCTTGTGATTGT |
| Cell wall metabolism sensor histidine kinase ( <i>walk</i> )                           | F: GCGCACAATGGTCGTATTTG<br>R: TTCATCCCAATCACCGTCTTC      |
| CDP-diacylglycerol–glycerol-3- phosphate 3-<br>phosphatidyltransferase ( <i>pgsA</i> ) | F: GCCAGAGAATTTGCCGTAAC<br>R: CCAATGGATCACCTAATAAC       |
| ATP-dependent Clp protease ATP-binding<br>subunit ( <i>clpX</i> )                      | F: GTGGTGCCTTTGATGGTATTG<br>R: CTGGGCGAATTTGTGCTAATAA    |
| Two-component sensor histidine kinase ( <i>vraS</i> )                                  | F: AGAACCACCATTAGACCAACAA<br>R: AGCAAAGCACGCATTTCTTAAC   |
| D-Alanine–poly(phosphoribitol) ligase subunit<br>1 ( <i>dltA</i> )                     | F: TCCCAAGTGCGACGATTTAC<br>R: CTTTCAACGCCAACAGGTAATG     |
| Bifunctional lysyl-phosphatidylglycerol<br>flippase/synthetase ( <i>mprF</i> )         | F: CAATGGTTAGACCACCCGATAA<br>R: CGTCAACAATTACACCACAGAAA  |

**Table S2.** Fold change in the gene expression of GAU-S and GAU-R during growth phases

| Gene        | Fold change<br>GAU-S<br>Mid-log vs<br>GAU-S<br>Late-Exp | P value<br>GAU-S<br>Mid-log<br>vs GAU-S<br>Late-<br>Exp | Fold change<br>GAU-S Late-<br>Exp vs GAU-<br>S stationary | P value<br>GAU-S Late-<br>Exp vs GAU-<br>S stationary | Fold change<br>GAU-S<br>Mid-log vs<br>GAU-S<br>stationary | P value<br>GAU-S<br>Mid-log vs<br>GAU-S<br>stationary | Fold change<br>GAU-R<br>Mid-log vs<br>GAU-R<br>Late-Exp | P value<br>GAU-R<br>Mid-log vs<br>GAU-R<br>Late-Exp | Fold change<br>GAU-R Late-<br>Exp vs GAU-<br>R stationary | P value<br>GAU-R<br>Late-Exp vs<br>GAU-R<br>stationary | Fold change<br>GAU-R<br>Mid-log vs<br>GAU-R<br>stationary | P value<br>GAU-R<br>Mid-log vs<br>GAU-R<br>stationary |
|-------------|---------------------------------------------------------|---------------------------------------------------------|-----------------------------------------------------------|-------------------------------------------------------|-----------------------------------------------------------|-------------------------------------------------------|---------------------------------------------------------|-----------------------------------------------------|-----------------------------------------------------------|--------------------------------------------------------|-----------------------------------------------------------|-------------------------------------------------------|
| <i>vraS</i> | 1,246 down                                              | 0.105722                                                | 1,112 down                                                | 0.232520                                              | 1,387 down                                                | 0.034592                                              | 1,097 up                                                | 0.369732                                            | 10,22 down                                                | 0.000007                                               | 9,319 down                                                | 0.002269                                              |
| <i>mprF</i> | 1,328 up                                                | 0.045860                                                | 4,629 up                                                  | 0.018009                                              | 6,149 up                                                  | 0.015098                                              | 1,108 up                                                | 0.277999                                            | 1,554 down                                                | 0.016026                                               | 1,402 down                                                | 0.002100                                              |
| <i>sceD</i> | 1,527 down                                              | 0.337240                                                | 1,952 down                                                | 0.007955                                              | 2,983 down                                                | 0.117119                                              | 3,817 up                                                | 0.002775                                            | 5,036 down                                                | 0.002181                                               | 1,319 down                                                | 0.040017                                              |
| <i>dltA</i> | 2,074 up                                                | 0.000181                                                | 1,018 down                                                | 0.553286                                              | 2,035 up                                                  | 0.000228                                              | 1,089 up                                                | 0.068296                                            | 6,554 down                                                | 0.000085                                               | 6,016 down                                                | 0.000003                                              |
| <i>walK</i> | 2,144 up                                                | 0.000342                                                | 1,237 up                                                  | 0.006604                                              | 2,653 up                                                  | 0.000273                                              | 1,763 up                                                | 0.001434                                            | 1,398 down                                                | 0.014999                                               | 1,261 up                                                  | 0.039324                                              |
| <i>pgsA</i> | 1,258 up                                                | 0.105264                                                | 1,065 up                                                  | 0.491694                                              | 1,342 up                                                  | 0.064047                                              | 3,09 up                                                 | 0.015388                                            | 21,49 down                                                | 0.005809                                               | 6,955 down                                                | 0.000177                                              |
| <i>clpX</i> | 2,166 up                                                | 0.000078                                                | 1,339 down                                                | 0.011037                                              | 1,617 up                                                  | 0.007103                                              | 3,56 up                                                 | 0.000188                                            | 27,326 down                                               | 0.000070                                               | 7,674 down                                                | <b>0.000100</b>                                       |
